# Supplementary figures and images for: SOX2 Silencing in Glioblastoma Tumor-Initiating Cells Causes Stop of Proliferation and Loss of Tumorigenicity
Source: Oxford University Press journal article supplement (doi:10.1634/stemcells.2008-0493), 2008-10-24

Suppl. Fig. 1

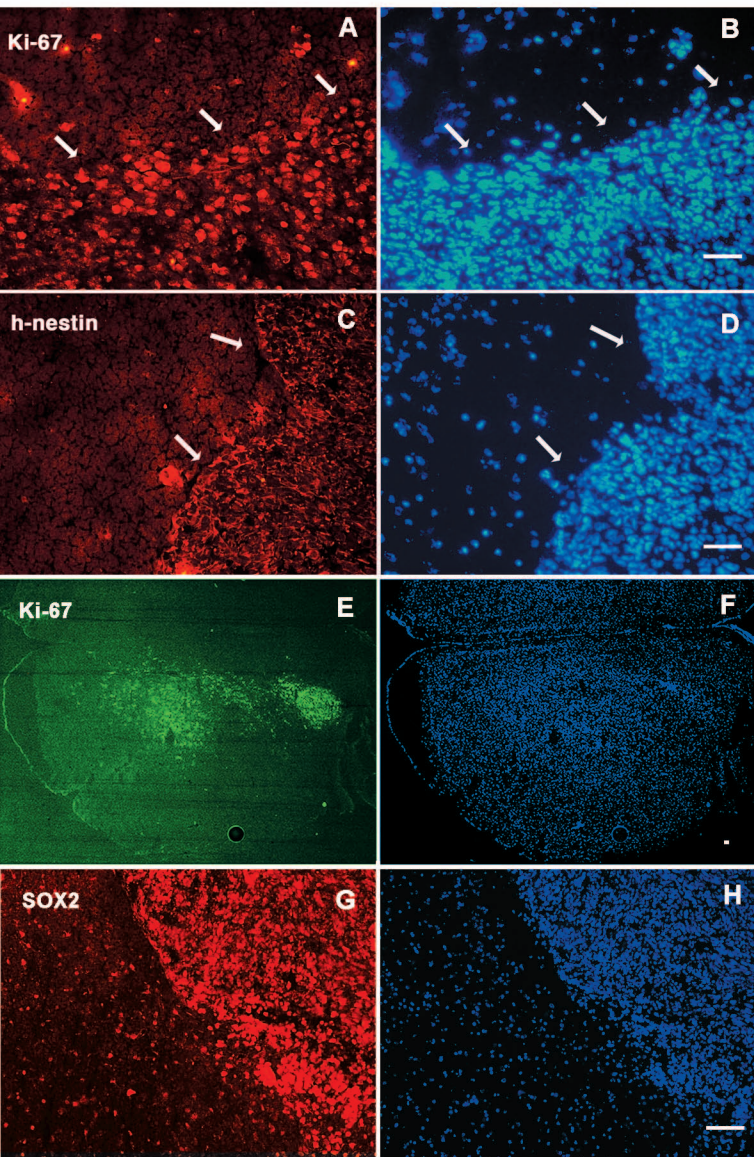

Supplement: stmcls_27_1_40_s1.pdf [file stmcls_27_1_40_s1.pdf]

Suppl. Fig. 3

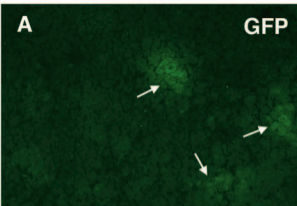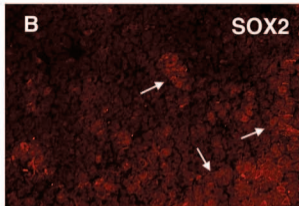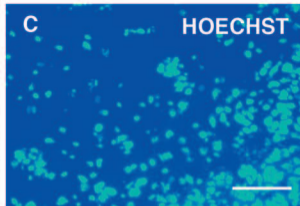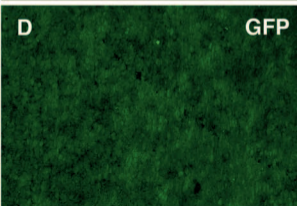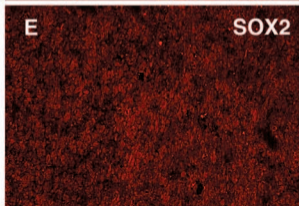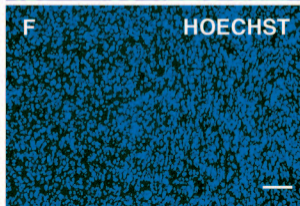

Supplement: stmcls_27_1_40_s3.pdf [file stmcls_27_1_40_s3.pdf]
